# Supplementary material for: The effect of oxygen fugacity on the evaporation of boron from aluminoborosilicate melt
Source: Copernicus journal article supplement (doi:10.5194/ejm-36-173-2024), 2024-02-06
Supplement: Supplementary file 1 [file ejm-36-173-2024-supplement.zip]

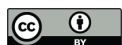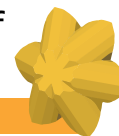

*Supplement of*

**The effect of oxygen fugacity on the evaporation of boron from aluminoborosilicate melt**

**Stamatis Flemetakis et al.**

*Correspondence to:* Stamatis Flemetakis (sflemetakis@ethz.ch, [stam.flemetakis@uni-muenster.de](mailto:stam.flemetakis@uni-muenster.de))

- [ejm-36-173-2024-supplement-title-page.pdf](#)
- [Supplements\\_discussion\\_melt\\_properties.docx](#)
- [Supplements\\_revised.xlsx](#)

The copyright of individual parts of the supplement might differ from the article licence.
